# Supplementary material for: RETRACTED: X-Linked Immunodeficient Mice With No Functional Bruton's Tyrosine Kinase Are Protected From Sepsis-Induced Multiple Organ Failure
Source: PubMed Central journal article supplement (PMC7580254; doi:10.3389/fimmu.2020.581758), 2020-10-07
Supplement: Table_1.pdf [file Table_1.pdf]

### Supplementary tables

**Table S1. UHPLC program.** Solvent A consisted of 0.1% formic acid in water, solvent B consisted of 0.1% formic acid in acetonitrile, solvent C consisted of methanol and solvent D consisted of 2-propanol. The column oven temperature was set to 50 °C.

| time<br>[min]       | flow<br>[mL/min] | solvent A<br>concentration<br>[%] | solvent B<br>concentration<br>[%] | solvent C<br>concentration<br>[%] | solvent D<br>concentration<br>[%] | solvent<br>B and C<br>curve* |
|---------------------|------------------|-----------------------------------|-----------------------------------|-----------------------------------|-----------------------------------|------------------------------|
| primary metabolites |                  |                                   |                                   |                                   |                                   |                              |
| 0.01                | 0.25             | 100                               |                                   |                                   |                                   |                              |
| 2.00                | 0.25             | 100                               |                                   |                                   |                                   |                              |
| 5.00                | 0.25             | 75                                |                                   |                                   |                                   |                              |
| 11.00               | 0.25             | 65                                |                                   |                                   |                                   |                              |
| 15.00               | 0.25             | 5                                 |                                   |                                   |                                   |                              |
| 20.00               | 0.25             | 5                                 |                                   |                                   |                                   |                              |
| 20.01               | 0.25             | 100                               |                                   |                                   |                                   |                              |
| 25.00               | stop             |                                   |                                   |                                   |                                   |                              |
| lipid mediators     |                  |                                   |                                   |                                   |                                   |                              |
| 0                   | 0.2              | 90                                | 10                                |                                   |                                   |                              |
| 10.0                | 0.2              | 75                                | 25                                |                                   |                                   |                              |
| 20.0                | 0.2              | 65                                | 35                                |                                   |                                   |                              |
| 40.0                | 0.2              | 25                                | 75                                |                                   |                                   |                              |
| 40.2                | 0.2              | 5                                 | 95                                |                                   |                                   |                              |
| 50.0                | 0.2              | 5                                 | 90                                |                                   |                                   |                              |
| 50.2                | 0.2              | 90                                | 10                                |                                   |                                   |                              |
| 59.0                | Stop             |                                   |                                   |                                   |                                   |                              |
| phospholipids       |                  |                                   |                                   |                                   |                                   |                              |
| 0.0                 | 0.15             | 80                                | 10                                |                                   | 10                                |                              |
| 2.0                 | 0.15             | 80                                | 10                                |                                   | 10                                |                              |

|      |      |     |      |      |    |
|------|------|-----|------|------|----|
| 4.0  | 0.15 | 60  | 20   | 20   | -3 |
| 50.0 | 0.15 | 7.6 | 46.2 | 46.2 |    |
| 52.0 | 0.15 | 0   | 50   | 50   |    |
| 70.0 | 0.15 | 0   | 50   | 50   |    |
| 70.2 | 0.15 | 80  | 10   | 10   |    |
| 80.0 | stop |     |      |      |    |

---

sphingosine-1-phosphate and sphingosine

|      |      |    |     |
|------|------|----|-----|
| 0    | 0.4  | 90 | 10  |
| 0.01 | 0.4  | 0  | 100 |
| 3.00 | 0.4  | 0  | 100 |
| 5.00 | 0.8  | 0  | 100 |
| 7.00 | 0.8  | 0  | 100 |
| 7.01 | 0.8  | 90 | 10  |
| 7.80 | 0.8  | 90 | 10  |
| 8.30 | 0.3  | 90 | 10  |
| 9.50 | 0.3  | 90 | 10  |
| 9.51 | Stop |    |     |

---

\*sets the gradient curve of the solvent (-10 to 10)

**Table S2. Mass spectrometer (LCMS 8050) settings.**

| <b>source conditions</b>                           | <b>parameters</b>             |
|----------------------------------------------------|-------------------------------|
| <b>nebulizing gas flow rate</b>                    | 3.0 L/min                     |
| <b>heating gas flow rate</b>                       | 10.0 L/min                    |
| <b>drying gas flow rate</b>                        | 10.0 L/min                    |
| <b>collision-induced dissociation gas pressure</b> | 230 kPa                       |
| <b>interface temperature</b>                       | 300 °C                        |
| <b>desolvation line temperature</b>                | 250 °C                        |
| <b>block heater temperature</b>                    | 400 °C                        |
| <b>ionization mode</b>                             | electrospray ionisation (ESI) |

**Table S3: Mass transitions for identified significantly changed primary metabolites.** The target ion shows the multiple reaction monitoring (MRM) transitions, the ionization polarity (IP) shows the ionization mode of the electrospray ionization (ESI) source and the internal standard (IS) column assigns the number of the internal standard to the compounds with which they were evaluated. The internal standard is marked in bold letters. Injection volume of 10  $\mu$ l sample.

| no. | compound                                   | target ion    | IP | IS |
|-----|--------------------------------------------|---------------|----|----|
| 1   | 4-hydroxyproline                           | 132.10>86.05  | +  | 1  |
| 2   | adenine                                    | 136.00>119.05 | +  | 1  |
| 3   | adenosine monophosphate                    | 348.00>136.05 | +  | 1  |
| 4   | adenylsuccinic acid                        | 464.10>252.10 | +  | 1  |
| 5   | alanine                                    | 89.90>89,90   | +  | 1  |
| 6   | arginine                                   | 175.10>70.10  | +  | 1  |
| 7   | argininosuccinic acid                      | 291.00>70.10  | +  | 1  |
| 8   | asparagine                                 | 133.10>87.15  | +  | 1  |
| 9   | bilirubin                                  | 583.30>285.25 | -  | 1  |
| 10  | carnitine                                  | 162.10>103.05 | +  | 1  |
| 11  | carnosine                                  | 227.10>110.05 | +  | 1  |
| 12  | choline <sup>†</sup>                       | 104.10>60.05  | +  | 1  |
| 13  | cholesterol                                | 369.40>161.30 | +  | 1  |
| 14  | citrulline                                 | 176.10>70.05  | +  | 1  |
| 15  | creatine                                   | 132.10>44.05  | +  | 1  |
| 16  | creatinine                                 | 114.10>44.05  | +  | 1  |
| 17  | cystathionine                              | 223.00>88.05  | +  | 1  |
| 18  | cystine                                    | 241.00>151.95 | +  | 1  |
| 19  | cytidine                                   | 244.10>112.05 | +  | 1  |
| 20  | cytidine 3',5'-cyclic monophosphate (cAMP) | 306.00>112.10 | +  | 1  |
| 21  | cytidine monophosphate                     | 324.00>112.05 | +  | 1  |
| 22  | cytosine                                   | 112.00>95.10  | +  | 1  |

|    |                                             |               |   |   |
|----|---------------------------------------------|---------------|---|---|
| 23 | dihydroxyphenylalanine (DOPA)               | 198.10>152.10 | + | 1 |
| 24 | dimethylarginine (symmetric/asymmetric)     | 203.10>70.15  | + | 1 |
| 25 | dimethylglycine                             | 104.10>58.05  | + | 1 |
| 26 | flavin adenine dinucleotide                 | 786.15>136.10 | + | 1 |
| 27 | flavin mononucleotide                       | 455.00>97.00  | - | 1 |
| 28 | glutamic acid                               | 147.90>84.10  | + | 1 |
| 29 | glutamine                                   | 147.10>84.15  | + | 1 |
| 30 | glutathione                                 | 308.00>179.10 | + | 1 |
| 31 | guanosine 3',5'-cyclic monophosphate (cGMP) | 346.00>152.05 | + | 1 |
| 32 | guanosine monophosphate                     | 364.00>152.05 | + | 1 |
| 33 | histamine                                   | 112.10>95.05  | + | 1 |
| 34 | histidine                                   | 155.90>110.10 | + | 1 |
| 35 | isoleucine                                  | 132.10>69.15  | + | 1 |
| 36 | kynurenine                                  | 209.10>192.05 | + | 1 |
| 37 | leucine                                     | 132.10>30.05  | + | 1 |
| 38 | lysine                                      | 147.10>84.10  | + | 1 |
| 39 | niacinamide                                 | 123.10>80.05  | + | 1 |
| 40 | nicotinic acid                              | 124.05>80.05  | + | 1 |
| 41 | ophthalmic acid                             | 290.10>58.10  | + | 1 |
| 42 | ornithine                                   | 133.10>70.10  | + | 1 |
| 43 | phenylalanine                               | 166.10>120.10 | + | 1 |
| 44 | proline                                     | 116,10>70,15  | + | 1 |
| 45 | oxidized glutathione                        | 611.10>306.00 | - | 1 |
| 46 | s-adenosylmethionine                        | 399.10>250.05 | + | 1 |
| 47 | serotonin                                   | 177.10>160.10 | + | 1 |
| 48 | threonine                                   | 120.10>74.15  | + | 1 |

|           |                                             |                        |          |          |
|-----------|---------------------------------------------|------------------------|----------|----------|
| <b>49</b> | thymidine                                   | 243.10>127.10          | +        | 1        |
| <b>50</b> | thymidine monophosphate                     | 322.90>81.10           | +        | 1        |
| <b>51</b> | tyrosine                                    | 182.10>136.10          | +        | 1        |
| <b>52</b> | uracil                                      | 113.00>70.00           | +        | 1        |
| <b>53</b> | uric acid                                   | 167.10>123.95          | -        | 1        |
| <b>54</b> | uridine                                     | 245.00>113.05          | +        | 1        |
| <b>55</b> | valine                                      | 118.10>72.15           | +        | 1        |
| <b>56</b> | <b>2-morpholinoethanesulfonic acid (IS)</b> | <b>194.00&gt;80.15</b> | <b>-</b> | <b>1</b> |

---

<sup>†</sup>illustrated in heatmaps of phospholipids

**Table S4: Mass transitions for identified significantly changed phospholipids.** The target ion shows the multiple reaction monitoring (MRM) transitions, the ionization polarity (IP) shows the ionization mode of the ESI source and the internal standard (IS) column assigns the number of the internal standard to the lipid species with which they were evaluated. The internal standard is marked in bold letters. (LPC: lysophosphatidylcholine, PC: phosphatidylcholine, LPE: lysophosphatidylethanolamine, PE: phosphatidylethanolamine, LPG: lysophosphatidylglycerol, LPI: lysophosphatidylinositol, PI: phosphatidylinositol, LPS: lysophosphatidylserine, PS: phosphatidylserine, SM: sphingomyelin)

| no. | lipid species | target ion   | IP | IS |
|-----|---------------|--------------|----|----|
| 1   | LPC(16:1)     | 494.3>184.10 | +  | 1  |
| 2   | LPC(18:1)*    | 522.4>184.10 | +  | 1  |
| 3   | LPC(18:3)     | 518.3>184.10 | +  | 1  |
| 4   | LPC(20:0)     | 552.4>184.10 | +  | 1  |
| 5   | LPC(20:1)     | 550.4>184.10 | +  | 1  |
| 6   | LPC(20:2)     | 548.4>184.10 | +  | 1  |
| 7   | LPC(20:3)     | 546.4>184.10 | +  | 1  |
| 8   | LPC(20:4)*    | 544.4>184.10 | +  | 1  |
| 9   | LPC(20:5)     | 542.3>184.10 | +  | 1  |
| 10  | LPC(22:0)     | 580.5>184.10 | +  | 1  |
| 11  | LPC(22:1)     | 578.4>184.10 | +  | 1  |
| 12  | LPC(22:6)*    | 568.4>184.10 | +  | 1  |
| 13  | PC(30:0)      | 706.6>184.10 | +  | 1  |
| 14  | PC(30:1)*     | 704.5>184.10 | +  | 1  |
| 15  | PC(30:2)*     | 702.5>184.10 | +  | 1  |
| 16  | PC(32:0)*     | 734.6>184.10 | +  | 1  |
| 17  | PC(32:1)*     | 732.6>184.10 | +  | 1  |
| 18  | PC(32:2)      | 730.6>184.10 | +  | 1  |
| 19  | PC(34:3)*     | 756.6>184.10 | +  | 1  |
| 20  | PC(36:0)      | 790.7>184.10 | +  | 1  |
| 21  | PC(36:1)*     | 788.6>184.10 | +  | 1  |

|    |           |              |   |   |
|----|-----------|--------------|---|---|
| 22 | PC(36:3)* | 784.6>184.10 | + | 1 |
| 23 | PC(36:5)* | 780.6>184.10 | + | 1 |
| 24 | PC(38:1)  | 816.7>184.10 | + | 1 |
| 25 | PC(38:2)* | 814.7>184.10 | + | 1 |
| 26 | PC(38:3)* | 812.6>184.10 | + | 1 |
| 27 | PC(38:5)* | 808.6>184.10 | + | 1 |
| 28 | PC(38:7)* | 804.6>184.10 | + | 1 |
| 29 | PC(38:8)  | 802.6>184.10 | + | 1 |
| 30 | PC(40:0)  | 846.7>184.10 | + | 1 |
| 31 | PC(40:1)  | 844.7>184.10 | + | 1 |
| 32 | PC(40:2)  | 842.7>184.10 | + | 1 |
| 33 | PC(40:3)  | 840.7>184.10 | + | 1 |
| 34 | PC(40:4)  | 838.7>184.10 | + | 1 |
| 35 | PC(40:5)* | 836.6>184.10 | + | 1 |
| 36 | PC(40:7)* | 832.6>184.10 | + | 1 |
| 37 | PC(40:8)  | 830.6>184.10 | + | 1 |
| 38 | PC(42:0)  | 874.8>184.10 | + | 1 |
| 39 | PC(42:1)  | 872.7>184.10 | + | 1 |
| 40 | PC(42:2)  | 870.7>184.10 | + | 1 |
| 41 | PC(42:3)  | 868.7>184.10 | + | 1 |
| 42 | PC(42:4)  | 866.7>184.10 | + | 1 |
| 43 | PC(42:5)  | 864.7>184.10 | + | 1 |
| 44 | PC(42:6)  | 862.7>184.10 | + | 1 |
| 45 | PC(42:7)  | 860.6>184.10 | + | 1 |
| 46 | PC(42:8)  | 858.6>184.10 | + | 1 |
| 47 | PC(44:1)  | 900.8>184.10 | + | 1 |



|           |           |              |   |   |
|-----------|-----------|--------------|---|---|
| <b>48</b> | PC(44:6)  | 890.7>184.10 | + | 1 |
| <b>49</b> | PC(44:7)  | 888.7>184.10 | + | 1 |
| <b>50</b> | LPE(14:0) | 426.3>285.24 | + | 1 |
| <b>51</b> | LPE(14:1) | 424.3>283.23 | + | 1 |
| <b>52</b> | LPE(16:0) | 454.3>313.27 | + | 1 |
| <b>53</b> | LPE(16:1) | 452.3>311.26 | + | 1 |
| <b>54</b> | LPE(18:0) | 482.3>341.30 | + | 1 |
| <b>55</b> | LPE(18:1) | 480.3>339.29 | + | 1 |
| <b>56</b> | LPE(18:2) | 478.3>337.27 | + | 1 |
| <b>57</b> | LPE(18:3) | 476.3>335.26 | + | 1 |
| <b>58</b> | LPE(20:0) | 510.4>369.34 | + | 1 |
| <b>59</b> | LPE(20:2) | 506.3>365.30 | + | 1 |
| <b>60</b> | LPE(20:3) | 504.3>363.29 | + | 1 |
| <b>61</b> | LPE(20:4) | 502.3>361.27 | + | 1 |
| <b>62</b> | LPE(20:5) | 500.3>359.26 | + | 1 |
| <b>63</b> | LPE(22:0) | 538.4>397.37 | + | 1 |
| <b>64</b> | LPE(22:1) | 536.4>395.35 | + | 1 |
| <b>65</b> | LPE(22:6) | 526.3>385.27 | + | 1 |
| <b>66</b> | PE(32:0)  | 692.5>551.50 | + | 1 |
| <b>67</b> | PE(32:1)  | 690.5>549.49 | + | 1 |
| <b>68</b> | PE(32:2)  | 688.5>547.47 | + | 1 |
| <b>69</b> | PE(34:1)  | 718.6>577.52 | + | 1 |
| <b>70</b> | PE(34:2)  | 716.5>575.50 | + | 1 |
| <b>71</b> | PE(34:3)  | 714.5>573.49 | + | 1 |
| <b>72</b> | PE(36:1)  | 746.6>605.55 | + | 1 |
| <b>73</b> | PE(36:2)  | 744.6>603.53 | + | 1 |

|           |           |              |   |   |
|-----------|-----------|--------------|---|---|
| <b>74</b> | PE(36:3)  | 742.6>601.52 | + | 1 |
| <b>75</b> | PE(36:4)  | 740.5>599.50 | + | 1 |
| <b>76</b> | PE(36:5)  | 738.5>597.49 | + | 1 |
| <b>77</b> | PE(38:0)  | 776.6>635.60 | + | 1 |
| <b>78</b> | PE(38:1)  | 774.6>633.58 | + | 1 |
| <b>79</b> | PE(38:2)  | 772.6>631.57 | + | 1 |
| <b>80</b> | PE(38:3)  | 770.6>629.55 | + | 1 |
| <b>81</b> | PE(38:4)  | 768.6>627.53 | + | 1 |
| <b>82</b> | PE(38:5)* | 766.6>625.52 | + | 1 |
| <b>83</b> | PE(38:7)  | 762.5>621.49 | + | 1 |
| <b>84</b> | PE(40:0)  | 804.7>663.63 | + | 1 |
| <b>85</b> | PE(40:4)  | 796.6>655.57 | + | 1 |
| <b>86</b> | PE(40:5)  | 794.6>653.55 | + | 1 |
| <b>87</b> | PE(40:6)  | 792.6>651.53 | + | 1 |
| <b>88</b> | PE(40:7)  | 790.6>649.52 | + | 1 |
| <b>89</b> | PE(40:8)  | 788.5>647.50 | + | 1 |
| <b>90</b> | PE(42:0)  | 832.7>691.66 | + | 1 |
| <b>91</b> | PE(42:1)  | 830.7>689.64 | + | 1 |
| <b>92</b> | PE(44:0)  | 860.7>719.69 | + | 1 |
| <b>93</b> | LPG(14:1) | 455.3>283.14 | + | 1 |
| <b>94</b> | LPG(16:0) | 485.3>313.19 | + | 1 |
| <b>95</b> | LPG(16:1) | 483.3>311.17 | + | 1 |
| <b>96</b> | LPG(18:1) | 511.3>339.20 | + | 1 |
| <b>97</b> | LPG(18:2) | 509.3>337.19 | + | 1 |
| <b>98</b> | LPI(16:0) | 571.3>241.01 | - | 1 |
| <b>99</b> | LPI(18:0) | 599.3>241.01 | - | 1 |

|            |           |              |   |   |
|------------|-----------|--------------|---|---|
| <b>100</b> | LPI(18:1) | 597.3>241.01 | - | 1 |
| <b>101</b> | LPI(18:2) | 595.3>241.01 | - | 1 |
| <b>102</b> | LPI(20:4) | 619.3>241.01 | - | 1 |
| <b>103</b> | LPI(22:6) | 643.3>241.01 | - | 1 |
| <b>104</b> | PI(34:1)  | 835.6>241.01 | - | 1 |
| <b>105</b> | PI(34:2)  | 833.5>241.01 | - | 1 |
| <b>106</b> | PI(36:1)  | 863.6>241.01 | - | 1 |
| <b>107</b> | PI(36:2)  | 861.6>241.01 | - | 1 |
| <b>108</b> | PI(36:3)  | 859.6>241.01 | - | 1 |
| <b>109</b> | PI(36:4)  | 857.5>241.01 | - | 1 |
| <b>110</b> | PI(36:5)  | 855.5>241.01 | - | 1 |
| <b>111</b> | PI(38:4)  | 885.6>241.01 | - | 1 |
| <b>112</b> | PI(38:5)  | 883.6>241.01 | - | 1 |
| <b>113</b> | PI(38:6)  | 881.5>241.01 | - | 1 |
| <b>114</b> | PI(40:6)  | 909.6>241.01 | - | 1 |
| <b>115</b> | LPS(16:0) | 498.3>313.26 | + | 1 |
| <b>116</b> | LPS(18:0) | 526.3>341.29 | + | 1 |
| <b>117</b> | LPS(18:1) | 524.3>339.28 | + | 1 |
| <b>118</b> | LPS(18:2) | 522.3>337.26 | + | 1 |
| <b>119</b> | LPS(20:4) | 546.3>361.26 | + | 1 |
| <b>120</b> | LPS(22:6) | 570.3>385.26 | + | 1 |
| <b>121</b> | PS(34:1)  | 762.6>577.51 | + | 1 |
| <b>122</b> | PS(36:1)  | 790.6>605.54 | + | 1 |
| <b>123</b> | PS(36:2)  | 788.6>603.52 | + | 1 |
| <b>124</b> | PS(36:4)  | 784.5>599.49 | + | 1 |
| <b>125</b> | PS(36:5)  | 782.5>597.48 | + | 1 |

|            |                                          |                       |          |          |
|------------|------------------------------------------|-----------------------|----------|----------|
| <b>126</b> | PS(36:6)                                 | 780.5>595.46          | +        | 1        |
| <b>127</b> | PS(38:3)                                 | 814.6>629.54          | +        | 1        |
| <b>128</b> | PS(38:4)                                 | 812.6>627.52          | +        | 1        |
| <b>129</b> | PS(38:6)                                 | 808.5>623.49          | +        | 1        |
| <b>130</b> | PS(38:8)                                 | 804.5>619.46          | +        | 1        |
| <b>131</b> | PS(40:4)                                 | 840.6>655.56          | +        | 1        |
| <b>132</b> | PS(40:5)                                 | 838.6>653.54          | +        | 1        |
| <b>133</b> | PS(40:6)                                 | 836.6>651.52          | +        | 1        |
| <b>134</b> | PS(40:7)                                 | 834.6>649.51          | +        | 1        |
| <b>135</b> | SM(32:1)                                 | 675.6>184.10          | +        | 1        |
| <b>136</b> | SM(32:2)                                 | 673.6>184.10          | +        | 1        |
| <b>137</b> | SM(34:2)                                 | 701.6>184.10          | +        | 1        |
| <b>138</b> | SM(36:1)                                 | 731.6>184.10          | +        | 1        |
| <b>139</b> | SM(36:2)                                 | 729.6>184.10          | +        | 1        |
| <b>140</b> | SM(36:3)                                 | 727.6>184.10          | +        | 1        |
| <b>141</b> | SM(36:4)                                 | 725.6>184.10          | +        | 1        |
| <b>142</b> | SM(38:2)*                                | 757.6>184.10          | +        | 1        |
| <b>143</b> | SM(38:6)                                 | 749.6>184.10          | +        | 1        |
| <b>144</b> | SM(40:2)*                                | 785.7>184.10          | +        | 1        |
| <b>145</b> | <b>sphingosine-1-phosphate (17:0) IS</b> | <b>366.3&gt;250.4</b> | <b>+</b> | <b>1</b> |

\*0.5 µl sample injection volume

**Table S5: Mass transitions for identified significantly changed lipid mediators.** The target ion shows the multiple reaction monitoring (MRM) transitions, the ionization polarity (IP) shows the ionization mode of the ESI source and the internal standard (IS) column assigns the number of the internal standard to the lipid mediators with which they were evaluated. The internal standard is marked in bold letters.

| no. | compound                 |                                          | target ion            | IP       | IS       |
|-----|--------------------------|------------------------------------------|-----------------------|----------|----------|
| 1   | 9,10-DiHOME              | 9,10-dihydroxy-octadecenoic acid         | 313,2>201,2           | -        | 1        |
| 2   | 14-HDoHE                 | 14-hydroxy-docosahexaenoic acid          | 343,2>205,2           | -        | 1        |
| 3   | 19-HETE                  | 19-hydroxyeicosatetraenoic acid          | 319,2>275,2           | -        | 1        |
| 4   | AA                       | arachidonic acid                         | 303,2>303,2           | -        | 1        |
| 5   | cholic acid <sup>†</sup> |                                          | 407.25>407.25         | -        | 1        |
| 6   | DCA <sup>†</sup>         | deoxycholic acid                         | 391.30>391.30         | -        | 1        |
| 7   | DHA                      | docosahexaenoic acid                     | 327,2>283,2           | -        | 1        |
| 8   | EPA                      | eicosapentaenoic acid                    | 301,2>257,2           | -        | 1        |
| 9   | GLCA <sup>†</sup>        | glycolithocholic acid                    | 432.30>432.30         | -        | 1        |
| 10  | Lyso-PAF                 | lyso-platelet activating factor          | 482,3>184,1           | -        | 1        |
| 11  | OEA                      | oleoylethanolamine                       | 326,2>62,1            | +        | 1        |
| 12  | TCDCA <sup>†</sup>       | taurochenodeoxycholic acid               | 498.40>498.40         | -        | 1        |
| 13  | TDCA <sup>†</sup>        | taurodeoxycholic acid                    | 498.40>498.40         | -        | 1        |
| 14  | UDCA <sup>†</sup>        | ursodeoxycholic acid                     | 391.30>391.30         | -        | 1        |
| 15  | <b>S1P (17:0) IS</b>     | <b>sphingosine-1-phosphate (17:0) IS</b> | <b>366.3&gt;250.4</b> | <b>+</b> | <b>1</b> |

<sup>†</sup>illustrated in heatmap of primary metabolites

**Table S6: Mass transitions for sphingosine-1-phosphate and sphingosine.** The target ion shows the multiple reaction monitoring (MRM) transitions, the ionization polarity (IP) shows the ionization mode of the ESI source and the internal standard (IS) column assigns the number of the internal standard to the compounds with which they were evaluated. The internal standard is marked in bold letters.

| no. | compound                                 | target ion            | IP | IS       |
|-----|------------------------------------------|-----------------------|----|----------|
| 1   | sphingosine-1-phosphate <sup>†</sup>     | 380.3>264.4           | +  | 1        |
| 2   | sphingosine <sup>†</sup>                 | 300.4>282.4           | +  | 1        |
| 3   | <b>sphingosine-1-phosphate (17:0) IS</b> | <b>366.3&gt;250.4</b> | +  | <b>1</b> |

<sup>†</sup>illustrated in heatmap of phospholipids II

**Table S7. Average concentration of cytokines in serum.** Mice underwent sham or CLP surgery, 24 h later 31 cytokines and chemokines were assessed in serum. Data are expressed as mean  $\pm$  SEM (pg/ml). The following groups were studied WT sham ( $n = 5$ ), *Xid* sham ( $n = 5$ ), WT-CLP ( $n = 10$ ), *Xid*-CLP ( $n = 10$ ), WT-CLP + ibrutinib ( $n = 8$ ), *Xid*-CLP + ibrutinib ( $n = 6$ ).

|                        | WT Sham |         | <i>Xid</i> Sham |         | WT CLP   |          | <i>Xid</i> CLP |         | WT CLP + ibrutinib |         | <i>Xid</i> CLP + ibrutinib |         |
|------------------------|---------|---------|-----------------|---------|----------|----------|----------------|---------|--------------------|---------|----------------------------|---------|
|                        | Mean    | SEM +/- | Mean            | SEM +/- | Mean     | SEM +/-  | Mean           | SEM +/- | Mean               | SEM +/- | Mean                       | SEM +/- |
| BCA-1/CXCL13           | 7034.2  | 3097.9  | 8937.8          | 2330.0  | 83810.3  | 4310.6   | 77435.3        | 2269.3  | 85285.5            | 3220.6  | 80840.9                    | 1375.5  |
| CTACK/CCL27            | 1872.3  | 202.1   | 2327.4          | 398.1   | 3886.4   | 339.4    | 8395.2         | 1781.0  | 7661.8             | 1191.3  | 7369.2                     | 1032.9  |
| ENA-78/CXCL5           | 1980.0  | 772.6   | 2831.5          | 987.5   | 45770.7  | 5248.7   | 8462.4         | 969.7   | 11727.6            | 2524.8  | 7210.7                     | 982.8   |
| Eotaxin/CCL11          | 420.6   | 151.2   | 733.3           | 171.2   | 6869.6   | 356.5    | 1952.5         | 224.5   | 2690.1             | 465.2   | 1907.8                     | 179.3   |
| Eotaxin-2/CCL24        | 13102.7 | 4999.2  | 18708.2         | 3000.5  | 56736.3  | 5714.4   | 25735.7        | 2079.7  | 11983.1            | 1876.6  | 29652.0                    | 3562.5  |
| Fractalkine/CXCL1      | 264.5   | 9.1     | 279.7           | 17.5    | 1181.9   | 109.7    | 322.8          | 12.2    | 457.7              | 47.5    | 352.9                      | 20.4    |
| GM-CSF                 | 5.4     | 0.8     | 5.4             | 0.7     | 346.2    | 58.6     | 7.5            | 1.1     | 14.7               | 3.2     | 7.7                        | 0.7     |
| I-309/CCL1             | 45.6    | 4.9     | 58.4            | 14.0    | 198.7    | 66.5     | 799.7          | 190.5   | 80.1               | 15.6    | 11691.8                    | 9593.7  |
| IFN- $\gamma$          | 133.8   | 11.1    | 155.5           | 17.5    | 134.0    | 16.2     | 102.3          | 15.1    | 98.1               | 28.8    | 191.6                      | 14.4    |
| IL-1 $\beta$           | 680.0   | 57.0    | 706.3           | 72.6    | 1536.3   | 184.7    | 674.6          | 31.4    | 611.0              | 43.8    | 768.9                      | 28.0    |
| IL-2                   | 11.7    | 2.6     | 15.9            | 4.0     | 38.3     | 7.8      | 102.6          | 25.8    | 72.8               | 15.4    | 57.4                       | 18.7    |
| IL-6                   | 45.5    | 4.8     | 52.6            | 6.7     | 524272.8 | 43243.2  | 6380.9         | 1557.2  | 29367.0            | 18095.0 | 4296.7                     | 1827.7  |
| IL-4                   | 74.7    | 3.6     | 87.5            | 8.0     | 65.2     | 3.9      | 76.0           | 8.0     | 52.3               | 9.2     | 92.0                       | 3.5     |
| IL-10                  | 1296.5  | 84.4    | 1677.4          | 159.6   | 23882.5  | 2465.0   | 2077.0         | 370.9   | 3485.3             | 947.8   | 2252.3                     | 362.6   |
| IL-16                  | 978.4   | 68.9    | 1048.3          | 87.4    | 2836.1   | 207.4    | 1313.4         | 86.9    | 1814.6             | 200.3   | 1462.5                     | 95.6    |
| IP-10/CXCIL10          | 4561.3  | 205.3   | 4994.1          | 536.0   | 4837.9   | 327.2    | 4547.3         | 583.3   | 4036.2             | 420.8   | 5182.1                     | 157.5   |
| I-TAC/CXCL11           | 4666.7  | 272.0   | 5570.1          | 490.2   | 3217.0   | 291.5    | 3372.9         | 340.1   | 2991.7             | 826.7   | 5569.5                     | 376.0   |
| KC/CXCL1               | 298.0   | 24.0    | 337.9           | 24.5    | 158693.9 | 35967.2  | 9014.0         | 1570.5  | 16952.6            | 6344.1  | 8912.3                     | 2432.5  |
| MCP-1/CCL2             | 515.8   | 36.3    | 601.9           | 59.7    | 262035.2 | 117148.0 | 9660.5         | 3217.7  | 10558.8            | 3887.3  | 3100.1                     | 531.8   |
| MCP-5/CCL12            | 24.0    | 4.9     | 31.6            | 4.5     | 5348.5   | 785.1    | 935.7          | 129.2   | 1020.6             | 157.1   | 758.3                      | 70.1    |
| MDC/CCL22              | 190.9   | 41.0    | 210.3           | 35.3    | 1869.7   | 235.7    | 494.0          | 48.3    | 515.9              | 36.1    | 717.8                      | 69.6    |
| MIP-1 $\alpha$ /CCL3   | 27.5    | 2.1     | 34.0            | 3.7     | 4994.4   | 1664.0   | 175.4          | 56.9    | 81.7               | 24.5    | 56.1                       | 2.2     |
| MIP1- $\beta$ /CCL4    | 123.9   | 6.9     | 141.1           | 12.9    | 51791.1  | 19413.9  | 1445.3         | 372.8   | 2859.4             | 1022.9  | 509.2                      | 68.5    |
| MIP-3 $\alpha$ /CCL20  | 38.8    | 3.4     | 41.7            | 4.4     | 893.8    | 117.3    | 691.2          | 157.2   | 549.9              | 176.4   | 1134.8                     | 163.6   |
| MIP-3 $\beta$ /CCL19   | 2285.8  | 104.5   | 2520.6          | 204.6   | 3622.2   | 350.3    | 3830.6         | 351.0   | 2933.2             | 242.3   | 4925.1                     | 465.9   |
| Rantes/CCL5            | 28.8    | 5.4     | 33.4            | 5.9     | 2647.5   | 421.4    | 80.0           | 10.3    | 487.9              | 148.7   | 110.0                      | 24.3    |
| SCYB16/CXCL16          | 601.1   | 133.4   | 748.4           | 91.0    | 4588.5   | 467.1    | 2250.7         | 317.4   | 2440.4             | 447.1   | 1851.1                     | 266.6   |
| SDF-1 $\alpha$ /CXCL12 | 929.5   | 197.3   | 1263.0          | 218.9   | 447.7    | 63.0     | 1612.0         | 177.7   | 1113.3             | 341.6   | 2304.9                     | 389.7   |
| TARC/CCL17             | 115.6   | 16.7    | 146.8           | 21.6    | 3293.6   | 376.2    | 2269.2         | 441.2   | 755.4              | 114.8   | 5268.3                     | 1862.4  |
| TNF- $\alpha$          | 311.2   | 16.7    | 310.6           | 28.0    | 471.7    | 42.9     | 205.1          | 16.5    | 208.5              | 38.7    | 330.8                      | 27.1    |
